# Supplementary material for: Piezoelectric nanogenerator based on flexible PDMS–BiMgFeCeO6 composites for sound detection and biomechanical energy harvesting
Source: Royal Society of Chemistry journal article supplement (doi:10.1039/d1se01587g), 2021-01-01
Supplement: d1se01587g1.pdf [file d1se01587g1.pdf]

## **Piezoelectric nanogenerator based on flexible PDMS-BiMgFeCeO<sub>6</sub> composites for sound detection and biomechanical energy harvesting**

<sup>#1</sup>Sugato Hajra, <sup>#1</sup>Yumi Oh, <sup>1</sup>Manisha Sahu, <sup>1</sup>Kyungtaek Lee, <sup>1</sup>Hang-Gyeom Kim, <sup>2</sup>Basanta Kumar Panigrahi, <sup>3</sup>Krystian Mistewicz, <sup>\*1</sup>Hoe Joon Kim

<sup>1</sup>*Department of Robotics Engineering, Daegu Gyeongbuk Institute of Science and Technology, Daegu-42988, Republic of Korea*

<sup>2</sup>*Department of Electrical Engineering, Siksha 'O' Anusandhan Deemed to be university, Bhubaneswar-751030, India*

<sup>3</sup>*Institute of Physics - Center for Science and Education, Silesian University of Technology, Krasińskiego 8, 40-019, Katowice, Poland*

**#Equal Contribution:** *Sugato Hajra and Yumi Oh*

**\*Corresponding Author Email:** [joonkim@dgist.ac.kr](mailto:joonkim@dgist.ac.kr)

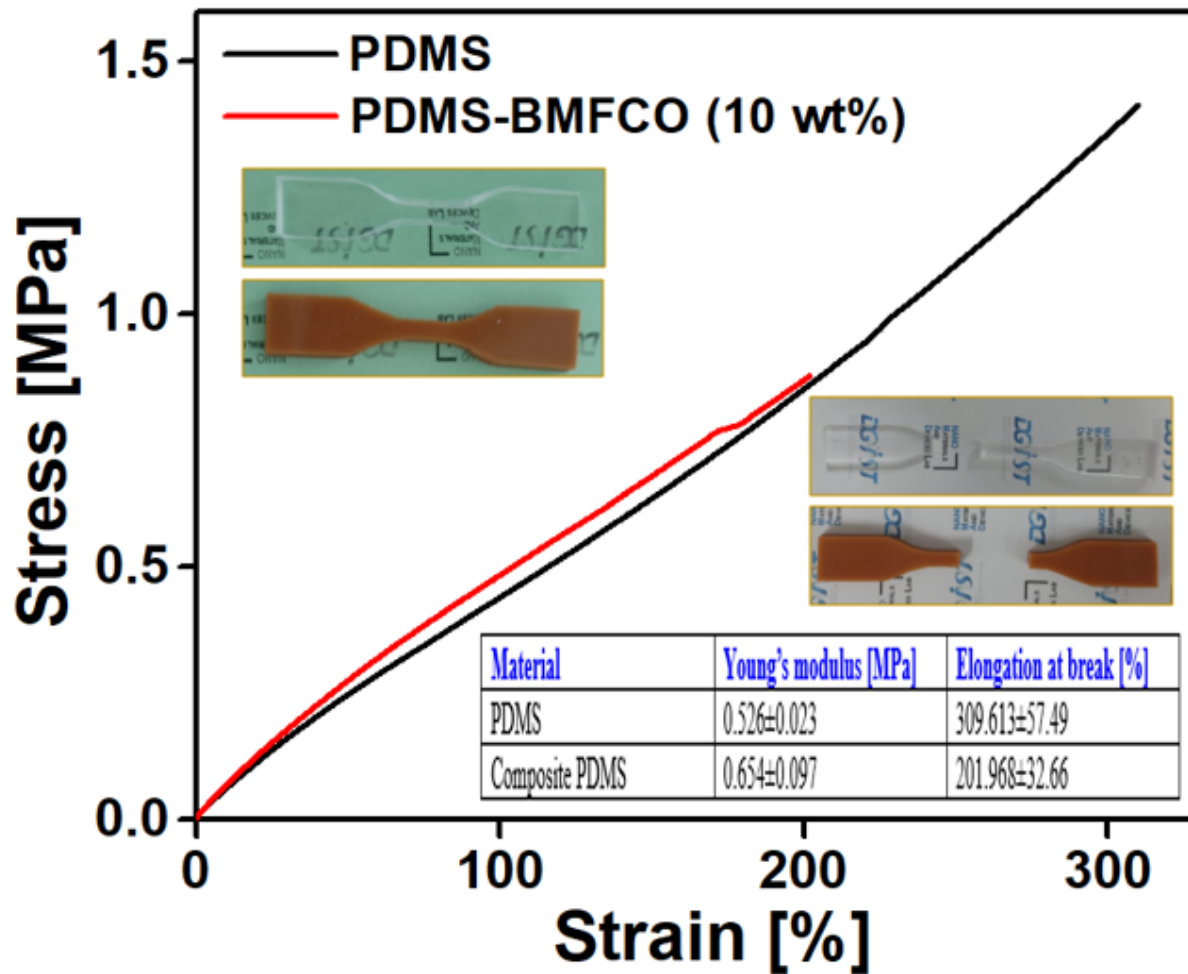

**Figure S1:** Comparison of the mechanical properties of PDMS and PDMS-BMFCO (10 wt %) along with Young's modulus in an inset.

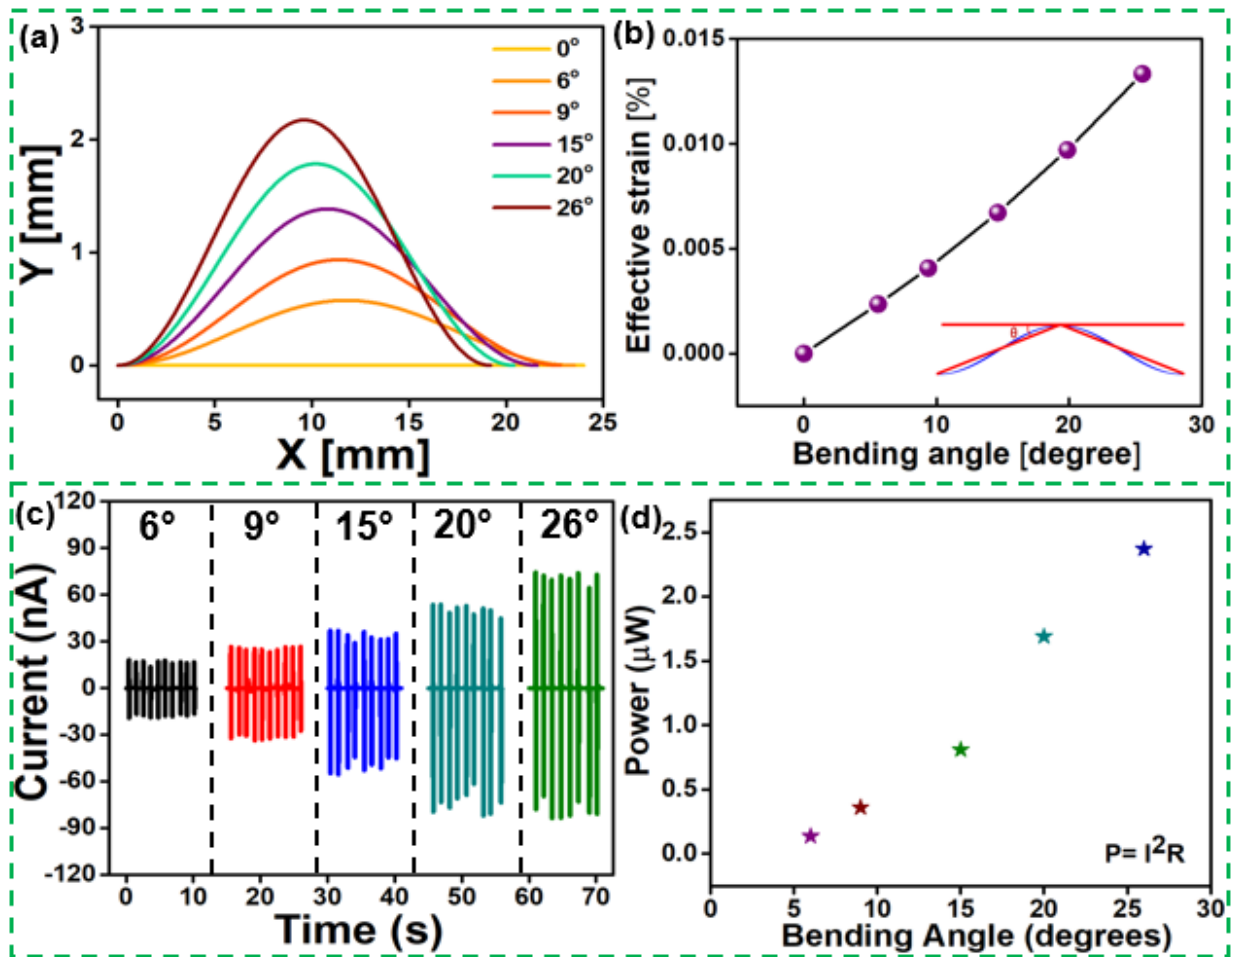

**Figure S2:** (a) The bending of the PENG10 device on the application of the horizontal force; (b) The effective strain generated at each bending angle; (c) current output of the PENG10 device at various bending angles and (d) power output of the PENG10 device at a various bending angle.
